# Supplementary material for: Genetic but No Phenotypic Associations between Biocide Tolerance and Antibiotic Resistance in Escherichia coli from German Broiler Fattening Farms
Source: MDPI journal article supplement (doi:10.3390/microorganisms9030651), 2021-03-21
Supplement: s1 [file s1]

## Supplemental Table S2

### Biocide tolerance genes screened in this study

| Gene                                       | Gene description                                                 | Accession no. | Source |
|--------------------------------------------|------------------------------------------------------------------|---------------|--------|
| <i>qacEΔ1</i>                              | quaternary ammonium compound efflux SMR transporter              | JN596280      | (1)    |
| <i>qacE</i>                                | quaternary ammonium compound-resistance protein                  | X68232        | (1)    |
| <i>qacF</i>                                | quaternary ammonium compound efflux SMR transporter              | JN596279      | (1)    |
| <i>qacH</i>                                | quaternary ammonium compound resistance protein                  | FJ160769      | (1)    |
| <i>qacI</i>                                | quaternary ammonium compound resistance protein                  | HQ875011      | (1)    |
| <i>qacG</i>                                | quaternary ammonium compound resistance protein                  | FJ950725      | (1)    |
| <i>emrE</i>                                | efflux-multidrug resistance protein                              | AIGY01000024  | (1)    |
| <i>mdfa</i>                                | multidrug efflux pump/Na(+):H(+) antiporter/K(+):H(+) antiporter | Y08743        | (1)    |
| <i>sugE(c)</i>                             | SMR family transporter                                           | X69949        | (1)    |
| <i>sugE(p)</i>                             | SMR family transporter                                           | HQ023864      | (1)    |
| <i>ydgE</i>                                | multidrug transporter subunit                                    | NC_011745     | (1)    |
| <i>ydgF</i>                                | multidrug transporter subunit                                    | NC_011745     | (1)    |
| <i>BW690_25775</i>                         | S-(hydroxymethyl)glutathione dehydrogenase                       | X73835.1      | (2)    |
| <i>slp</i> ( <i>Acid Fitness Island</i> )  | starvation lipoprotein                                           | NC_000913     | (3)    |
| <i>yhiF</i> ( <i>Acid Fitness Island</i> ) | putative DNA-binding transcriptional regulator                   | NC_000913     | (3)    |
| <i>yhiD</i> ( <i>Acid Fitness Island</i> ) | inner membrane protein                                           | NC_000913     | (3)    |
| <i>hdeB</i> ( <i>Acid Fitness Island</i> ) | periplasmic acid stress chaperone                                | NC_000913     | (3)    |
| <i>hdeA</i> ( <i>Acid Fitness Island</i> ) | acid stress chaperone                                            | NC_000913     | (3)    |
| <i>hdeD</i> ( <i>Acid Fitness Island</i> ) | acid-resistance membrane protein                                 | NC_000913     | (3)    |
| <i>gadE</i> ( <i>Acid Fitness Island</i> ) | DNA-binding transcriptional activator                            | NC_000913     | (3)    |
| <i>yhiU</i> ( <i>Acid Fitness Island</i> ) | multidrug efflux pump membrane fusion protein                    | NC_000913     | (3)    |
| <i>yhiV</i> ( <i>Acid Fitness Island</i> ) | multidrug efflux pump RND permease                               | NC_000913     | (3)    |
| <i>gadW</i> ( <i>Acid Fitness Island</i> ) | DNA-binding transcriptional dual regulator                       | NC_000913     | (3)    |
| <i>gadY</i> ( <i>Acid Fitness Island</i> ) | small regulatory RNA                                             | NC_000913     | (3)    |
| <i>gadX</i> ( <i>Acid Fitness Island</i> ) | DNA-binding transcriptional dual regulator                       | NC_000913     | (3)    |
| <i>gadA</i> ( <i>Acid Fitness Island</i> ) | glutamate decarboxylase A                                        | NC_000913     | (3)    |

### Virulence associated genes (VAGs) screened in this study

| Gene                  | Gene description                                            | Accession no.         | Source    | Group         |
|-----------------------|-------------------------------------------------------------|-----------------------|-----------|---------------|
| <i>afaB/afaC</i>      | afimbrial-adhesin-encoding gene                             | X76688.1              | (4)       | adhesion      |
| <i>afaE</i>           | afimbrial-adhesin-encoding gene                             | M12868                | (5)       | adhesion      |
| <i>bmaE</i>           | M-agglutinin subunit                                        | M15677                | (4)       | adhesion      |
| <i>fimA</i>           | type-1 fimbrial protein, A chain                            | NC_000913.3           | (6)       | adhesion      |
| <i>fimC</i>           | periplasm fimbrial chaperone protein                        | CP004009.1            | (7)       | adhesion      |
| <i>fimH</i>           | mannose-specific adhesin of type 1 fimbriae                 | AJ225176              | (4)       | adhesion      |
| <i>focG</i>           | F1C fimbriae subunit                                        | S68237                | (4)       | adhesion      |
| <i>gafD</i>           | G-fimbrial lectin protein                                   | L33969                | (4)       | adhesion      |
| <i>iha</i>            | bifunctional enterobactin receptor/adhesin protein          | GU725392              | (8)       | adhesion      |
| <i>papA</i>           | fimbrial major pilin protein                                | X61239                | (4)       | adhesion      |
| <i>papC</i>           | fimbrial major pilin protein                                | X61239                | (4)       | adhesion      |
| <i>papEF</i>          | fimbrial major pilin protein                                | X61239                | (4)       | adhesion      |
| <i>papG allele I</i>  | fimbrial major pilin protein                                | X61239                | (4)       | adhesion      |
| <i>papG allele I'</i> | fimbrial major pilin protein                                | X61239                | (4)       | adhesion      |
| <i>papG-allele-II</i> | fimbrial major pilin protein                                | M20181                | (4)       | adhesion      |
| <i>sfa/foc</i>        | S and F1C fimbriae subunits                                 | DQ301498              | (4)       | adhesion      |
| <i>sfaS</i>           | S fimbriae minor subunit SfaS                               | CP000243              | (4)       | adhesion      |
| <i>tsh</i>            | temperature-sensitive hemagglutinin                         | AY545598/<br>AF218073 | (9), (10) | adhesion      |
| <i>chuA</i>           | outer membrane hemin receptor                               | U67920.1              | (11)      | iron uptake   |
| <i>feoB</i>           | ferrous iron transporter, protein B                         | GU361604.1            | (12)      | iron uptake   |
| <i>fyuA</i>           | yersiniabactin/pesticin outer membrane receptor             | Z38064                | (13)      | iron uptake   |
| <i>ireA</i>           | iron-responsive element                                     | AE014075              | (8)       | iron uptake   |
| <i>iroD</i>           | salmochelinsiderophore system, ferric enterochelin esterase | DQ381420.1            | (14)      | iron uptake   |
| <i>iroN</i>           | iron outer membrane receptor                                | AF449498              | (14)      | iron uptake   |
| <i>irp-2</i>          | yersiniabactin biosynthetic protein                         | L18881.1              | (15)      | iron uptake   |
| <i>iucA</i>           | N(2)-citryl-N(6)-acetyl-N(6)-hydroxylysine synthase         | X76100.1              | -         | iron uptake   |
| <i>iucD</i>           | Iron uptake chelate protein D                               | M18968.1              | (16)      | iron uptake   |
| <i>iutA</i>           | aerobactin receptor                                         | X05874                | (4)       | iron uptake   |
| <i>sitA</i>           | structural injection transglycosylase                       | AY126440.1            | (17)      | iron uptake   |
| <i>flicC (H7)</i>     | H7 variant of the Escherichia coli flagellin gene           | NC002695              | (8)       | miscellaneous |
| <i>ibeA</i>           | invasion of brain endothelium                               | AF289032              | (4)       | miscellaneous |
| <i>ompT</i>           | Protease 7                                                  | 41044                 | (8)       | miscellaneous |
| <i>PAI(malX)</i>      | pathogenicity islands (PAIs)                                | AF00372               | (4)       | miscellaneous |
| <i>cvi-cvaC</i>       | colicin V immunity protein-colicin V synthesis protein      | X57525                | (18)      | protectins    |
| <i>iss</i>            | increased serum survival protein                            | CP001855              | (8)       | protectins    |
| <i>kpsMT (K1)</i>     | K1 capsular polysaccharide                                  | M57382.1              | (4)       | protectins    |
| <i>kpsMT II</i>       | group 2 capsular polysaccharide units                       | X53819.1              | (4)       | protectins    |
| <i>kpsMT III</i>      | Group III capsular polysaccharides                          | AF007777.1            | (4)       | protectins    |
| <i>neuC</i>           | UDP-N-acetylglucosamine (GlcNAc) 2-epimerase                | M84026.1              | (19)      | protectins    |

|              |                                            |            |      |            |
|--------------|--------------------------------------------|------------|------|------------|
| <i>ompA</i>  | outer membrane protein A                   | CP004009.1 | (7)  | protectins |
| <i>rfc</i>   | Escherichia coli O antigen polymerase gene | U39042     | (4)  | protectins |
| <i>astA</i>  | arginine succinyltransferase               | AY545598   | (10) | toxins     |
| <i>cdtB</i>  | cytolethal distending toxin protein        | AJ508930   | (20) | toxins     |
| <i>cnf-1</i> | cytotoxic necrotizing factor               | U42629     | (4)  | toxins     |
| <i>hlyA</i>  | hemolysin A                                | M10133     | (21) | toxins     |
| <i>hlyD</i>  | hemolysin D                                | 2128       | (8)  | toxins     |
| <i>hlyE</i>  | hemolysin E                                | AF052225   | (22) | toxins     |
| <i>hlyF</i>  | hemolysin F                                | 14615      | -    | toxins     |
| <i>vat</i>   | vacuolating autotransporter toxin          | X16664     | (23) | toxins     |

## References

1. Zou L, Meng J, McDermott PF, Wang F, Yang Q, Cao G, Hoffmann M, Zhao S. 2014. Presence of disinfectant resistance genes in *Escherichia coli* isolated from retail meats in the USA. J Antimicrob Chemother 69:2644-9.
2. Kummerle N, Feucht HH, Kaulfers PM. 1996. Plasmid-mediated formaldehyde resistance in *Escherichia coli*: characterization of resistance gene. Antimicrob Agents Chemother 40:2276-9.
3. Mates AK, Sayed AK, Foster JW. 2007. Products of the *Escherichia coli* acid fitness island attenuate metabolite stress at extremely low pH and mediate a cell density-dependent acid resistance. J Bacteriol 189:2759-68.
4. Johnson JR, Stell AL. 2000. Extended virulence genotypes of *Escherichia coli* strains from patients with urosepsis in relation to phylogeny and host compromise. J Infect Dis 181:261-72.
5. Labigne-Roussel A, Schmidt MA, Walz W, Falkow S. 1985. Genetic organization of the afimbrial adhesin operon and nucleotide sequence from a uropathogenic *Escherichia coli* gene encoding an afimbrial adhesin. J Bacteriol 162:1285-92.
6. Riley M, Abe T, Arnaud MB, Berlyn MK, Blattner FR, Chaudhuri RR, Glasner JD, Horiuchi T, Keseler IM, Kosuge T, Mori H, Perna NT, Plunkett G, 3rd, Rudd KE, Serres MH, Thomas GH, Thomson NR, Wishart D, Wanner BL. 2006. *Escherichia coli* K-12: a cooperatively developed annotation snapshot--2005. Nucleic Acids Res 34:1-9.
7. Mangiamale P, Nicholson B, Wannemuehler Y, Seemann T, Logue CM, Li G, Tivendale KA, Nolan LK. 2013. Complete genome sequence of the avian pathogenic *Escherichia coli* strain APEC O78. Genome announcements 1:e0002613-e0002613.
8. Johnson JR, Delavari P, Kuskowski M, Stell AL. 2001. Phylogenetic distribution of extraintestinal virulence-associated traits in *Escherichia coli*. J Infect Dis 183:78-88.
9. Dozois CM, Dho-Moulin M, Bree A, Fairbrother JM, Desautels C, Curtiss R, 3rd. 2000. Relationship between the Tsh autotransporter and pathogenicity of avian *Escherichia coli* and localization and analysis of the Tsh genetic region. Infect Immun 68:4145-54.
10. Skyberg JA, Johnson TJ, Johnson JR, Clabots C, Logue CM, Nolan LK. 2006. Acquisition of avian pathogenic *Escherichia coli* plasmids by a commensal *E. coli* isolate enhances its abilities to kill chicken embryos, grow in human urine, and colonize the murine kidney. Infect Immun 74:6287-92.
11. Clermont O, Bonacorsi S, Bingen E. 2000. Rapid and simple determination of the *Escherichia coli* phylogenetic group. Applied and environmental microbiology 66:4555-4558.
12. Mellata M, Ameiss K, Mo H, Curtiss R, 3rd. 2010. Characterization of the contribution to virulence of three large plasmids of avian pathogenic *Escherichia coli* chi7122 (O78:K80:H9). Infection and immunity 78:1528-1541.
13. Rakin A, Urbitsch P, Heesemann J. 1995. Evidence for two evolutionary lineages of highly pathogenic *Yersinia species*. J Bacteriol 177:2292-8.

14. Johnson TJ, Johnson SJ, Nolan LK. 2006. Complete DNA sequence of a ColBM plasmid from avian pathogenic *Escherichia coli* suggests that it evolved from closely related ColV virulence plasmids. *Journal of bacteriology* 188:5975-5983.
15. Guilvout I, Mercereau-Puijalon O, Bonnefoy S, Pugsley AP, Carniel E. 1993. High-molecular-weight protein 2 of *Yersinia enterocolitica* is homologous to AngR of *Vibrio anguillarum* and belongs to a family of proteins involved in nonribosomal peptide synthesis. *Journal of bacteriology* 175:5488-5504.
16. Herrero M, de Lorenzo V, Neilands JB. 1988. Nucleotide sequence of the *iucD* gene of the pColV-K30 aerobactin operon and topology of its product studied with *phoA* and *lacZ* gene fusions. *J Bacteriol* 170:56-64.
17. Runyen-Janecky LJ, Reeves SA, Gonzales EG, Payne SM. 2003. Contribution of the *Shigella flexneri* Sit, luc, and Feo iron acquisition systems to iron acquisition in vitro and in cultured cells. *Infection and immunity* 71:1919-1928.
18. Otto BR, van Dooren SJ, Nuijens JH, Luirink J, Oudega B. 1998. Characterization of a hemoglobin protease secreted by the pathogenic *Escherichia coli* strain EB1. *J Exp Med* 188:1091-1103.
19. Zapata G, Crowley JM, Vann WF. 1992. Sequence and expression of the *Escherichia coli* K1 *neuC* gene product. *J Bacteriol* 174:315-9.
20. Janka A, Bielaszewska M, Dobrindt U, Greune L, Schmidt MA, Karch H. 2003. Cytolethal distending toxin gene cluster in enterohemorrhagic *Escherichia coli* O157:H- and O157:H7: characterization and evolutionary considerations. *Infect Immun* 71:3634-8.
21. Felmler T, Pellett S, Lee EY, Welch RA. 1985. *Escherichia coli* hemolysin is released extracellularly without cleavage of a signal peptide. *J Bacteriol* 163:88-93.
22. Reingold J, Starr N, Maurer J, Lee MD. 1999. Identification of a new *Escherichia coli* She haemolysin homolog in avian *E. coli*. *Vet Microbiol* 66:125-34.
23. Parreira VR, Gyles CL. 2003. A novel pathogenicity island integrated adjacent to the *thrW* tRNA gene of avian pathogenic *Escherichia coli* encodes a vacuolating autotransporter toxin. *Infect Immun* 71:5087-96.
